# Supplementary material for: Tissue-specific Transcriptome analysis reveals lignocellulose synthesis regulation in elephant grass (Pennisetum purpureum Schum)
Source: BMC Plant Biol. 2020 Nov 19;20:528. doi: 10.1186/s12870-020-02735-3 (PMC7678330; doi:10.1186/s12870-020-02735-3)
Supplement: Supplementary file 6 — Additional file 6: Table S1. RNA sequencing data and corresponding quality control. [file 12870_2020_2735_MOESM6_ESM.xlsx]

## Sheet: Sheet1
Table1 RNA sequencing data and corresponding quality control
Sample	Raw base	Raw reads	Clean reads	Clean base	Error rate（%）	Q20，Q30（%）
T1-1-S1	12802554000	42675180	40913304	12253292047	0.03	94.33;90.84
T1-1-S2	8959956300	29866521	28734811	8605364293	0.03	94.43;91.02
T1-1-S3	9277762800	30925876	29872988	8947281260	0.03	94.52;91.35
T1-2-S1	21552129600	71840432	70345637	21069458372	0.03	93.59;91.77
T1-2-S2	17934129000	59780430	58646047	17565163462	0.03	93.52;92.20
T1-2-S3	10203491700	34011639	32810906	9828183195	0.03	94.15;91.04
T1-3-S1	14445512100	48151707	46610098	13960986798	0.03	94.16;90.91
T1-3-S2	9611849100	32039497	30757050	9211312109	0.03	93.57;89.91
T1-3-S3	9093972600	30313242	29256562	8763685220	0.03	94.48;92.14
T2-1-S1	4504316400	15014388	27109319	8118367933	0.03	93.90;91.19
T2-1-S2	7465785300	24885951	31633620	9473975009	0.03	94.00;92.08
T2-1-S3	8952717000	29842390	28222408	8450181488	0.03	94.19;90.96
T2-1-S4	9601583700	32005279	30897787	9254482268	0.03	94.51;91.59
T2-2-S1	7940250000	26467500	25204713	7544926652	0.03	93.88;91.52
T2-2-S2	9147075300	30490251	28830905	8631898073	0.03	93.97;92.13
T2-2-S3	17291441100	57638137	56528756	16925625379	0.03	92.70;90.31
T2-2-S4	11723216400	39077388	37832527	11331539976	0.03	94.19;91.05
T2-3-S1	9025888500	30086295	28706805	8595857333	0.03	94.03;92.02
T2-3-S2	16329405600	54431352	53394866	15988318991	0.03	93.26;91.41
T2-3-S3	6844577100	22815257	21912357	6562810997	0.03	94.64;90.91
T2-3-S4	11487804600	38292682	36702505	10993456613	0.03	94.61;91.45
T3-1-S1	14702759400	49009198	48278478	14458899188	0.03	93.41;91.27
T3-1-S2	7904290500	26347635	25891206	7756004712	0.03	94.30;92.91
T3-1-S3	8800922400	29336408	28308425	8478761545	0.03	94.51;91.60
T3-1-S4	12775428900	42584763	40836208	12232070507	0.03	94.36;91.83
T3-1-S5	7682253000	25607510	24484814	7332654801	0.03	93.74;91.77
T3-2-S1	10752402300	35841341	34471539	10323159424	0.03	94.36;92.09
T3-2-S2	9372386400	31241288	30167072	9035133728	0.03	94.56;91.76
T3-2-S3	11068437000	36894790	35384992	10595307334	0.03	94.18;90.27
T3-2-S4	8770546800	29235156	27650653	8279718742	0.03	93.05;90.89
T3-2-S5	11070258600	36900862	36403783	10905624250	0.03	94.48;91.40
T3-3-S1	10568179500	35227265	33774957	10113194730	0.03	94.25;91.54
T3-3-S2	17161208700	57204029	56430599	16901300389	0.03	93.48;91.33
T3-3-S3	12221018400	40736728	35478681	10620262375	0.03	93.72;91.98
T3-3-S4	8848602000	29495340	28623009	8574139321	0.03	94.25;91.94
T3-3-S5	11063286000	36877620	36350532	10890406607	0.03	94.18;91.72
Note：Twelve samples with the deepest sequencing are specially marked
