# Supplementary material for: Tissue-specific Transcriptome analysis reveals lignocellulose synthesis regulation in elephant grass (Pennisetum purpureum Schum)
Source: BMC Plant Biol. 2020 Nov 19;20:528. doi: 10.1186/s12870-020-02735-3 (PMC7678330; doi:10.1186/s12870-020-02735-3)
Supplement: Supplementary file 8 — Additional file 8: Table S3. KEGG annotations of 43 differential genes used for WGCNA analysis [file 12870_2020_2735_MOESM8_ESM.xlsx]

## Sheet: Sheet1
Table2 KEGG annotations of 43 differential genes used for WGCNA analysis
category	over_represented_pvalue	under_represented_pvalue	numDEInCat	numInCat	padj	term
940	4.27872e-07	1	23	176	5.56233e-05	00940 Phenylpropanoid biosynthesis [PATH:ko00940]
500	6.07856e-06	0.999998	23	188	0.000395106	00500 Starch and sucrose metabolism [PATH:ko00500]
270	0.000277647	0.999912	17	147	0.0120314	00270 Cysteine and methionine metabolism [PATH:ko00270]
460	0.000558527	0.999889	9	53	0.0181521	00460 Cyanoamino acid metabolism [PATH:ko00460]
410	0.00229724	0.999429	9	65	0.0597284	00410 beta-Alanine metabolism [PATH:ko00410]
603	0.00331786	0.999675	4	16	0.0718871	00603 Glycosphingolipid biosynthesis - globo and isoglobo series [PATH:ko00603]
480	0.00429568	0.998536	12	129	0.079777	00480 Glutathione metabolism [PATH:ko00480]
531	0.00542752	0.999396	4	15	0.0881972	00531 Glycosaminoglycan degradation [PATH:ko00531]
400	0.00666513	0.998032	9	73	0.0962741	00400 Phenylalanine, tyrosine and tryptophan biosynthesis [PATH:ko00400]
