# Supplementary material for: Tissue-specific Transcriptome analysis reveals lignocellulose synthesis regulation in elephant grass (Pennisetum purpureum Schum)
Source: BMC Plant Biol. 2020 Nov 19;20:528. doi: 10.1186/s12870-020-02735-3 (PMC7678330; doi:10.1186/s12870-020-02735-3)
Supplement: Supplementary file 9 — Additional file 9: Table S4. The expression level and functional annotation of 43 genes in WGCNA during T3 period and the correlation coefficient with lignin or cellulose synthesis. [file 12870_2020_2735_MOESM9_ESM.xlsx]

## Sheet: Table2
Table2 The expression levels and functional annotation of 43 DEGs in WGCNA during T1, T2 and T3 period and the correlation coefficient with lignin or cellulose
nodeName	Function	nodeAttr.nodesPresent...	connectivity	Cellulose_cor	Lignin_cor	Cellulose_pval	Lignin_pval	T1.1.S1	T1.1.S2	T1.1.S3	T1.2.S1	T1.2.S2	T1.2.S3	T1.3.S1	T1.3.S2	T1.3.S3	T2.1.S1	T2.1.S2	T2.1.S3	T2.1.S4	T2.2.S1	T2.2.S2	T2.2.S3	T2.2.S4	T2.3.S1	T2.3.S2	T2.3.S3	T2.3.S4	T3.1.S1	T3.1.S2	T3.1.S3	T3.1.S4	T3.1.S5	T3.2.S1	T3.2.S2	T3.2.S3	T3.2.S4	T3.2.S5	T3.3.S1	T3.3.S2	T3.3.S3	T3.3.S4	T3.3.S5
Cluster-15087.3	expansin-like A2	blue	0.923929	0.59481	-0.0952823	0.000130321	0.580415	6.28187	7.41016	4.56866	8.13811	7.81873	5.55524	6.85697	8.9085	5.03625	5.26167	7.30179	9.40505	8.06057	6.03678	7.1469	8.68758	7.628	5.9124	8.38801	9.56287	5.82906	4.51446	4.94605	7.96105	8.29856	5.52831	5.55865	6.81329	7.48251	9.07966	7.39558	5.23878	4.84999	6.54984	8.24809	4.67222
Cluster-18695.12252	alpha-humulene synthase	blue	0.946284	0.637393	0.0891567	2.91e-05	0.605091	2.17231	7.00342	2.17231	2.68457	4.57226	2.17231	3.82611	6.1662	2.17231	2.90722	5.04635	7.68084	5.39015	2.17231	5.44696	6.90778	4.80657	3.97669	5.9395	8.14064	4.44984	2.75157	3.82701	7.71861	7.71745	2.17231	2.17231	3.3854	5.47828	7.5181	5.39779	2.17231	3.11334	6.131	7.53883	2.17231
Cluster-18695.29798	probable galactinol-sucrose	blue	0.935271	0.528278	-0.086594	0.000927144	0.615546	5.29985	12.9111	4.39402	5.53851	10.0901	3.94315	8.77	13.4416	2.91494	2.90722	6.58627	12.8248	12.7586	3.96938	7.61443	11.6644	11.2963	3.57147	10.0934	12.0721	9.69049	3.64979	4.88134	10.7997	12.7371	3.89486	3.80602	5.94545	8.74238	11.2359	10.6361	3.98255	2.72197	8.06512	12.2461	3.39829
Cluster-18695.31523	O‐methyltransferase (OMT)	blue	0.930443	0.515531	0.0617781	0.0012916	0.720396	4.07886	6.41474	2.93739	5.14698	7.9613	2.17231	7.44225	8.62459	2.17231	4.77586	7.04532	9.29732	9.07996	4.21041	7.10292	8.4694	6.70894	5.21363	8.10904	8.59961	4.05709	4.41403	5.28142	7.90757	8.96492	2.17231	4.08728	5.10139	5.91644	8.47836	7.55158	2.84893	3.90106	6.7993	8.11589	2.17231
Cluster-4286.37	GhGalT1	blue	0.91696	0.595789	-0.121569	0.000126201	0.480003	6.13983	8.16041	6.79889	5.81553	7.36218	6.52478	6.42268	8.6471	5.45811	4.56646	5.80445	8.95979	7.51451	5.55424	7.94835	8.59838	7.40214	5.46164	7.65599	9.46147	5.99486	4.85469	6.17347	8.08066	8.81986	5.77856	4.08728	6.1432	7.70966	8.93326	7.32813	4.40481	5.33264	8.1657	8.6894	5.59498
Cluster-55067.0	transcription factor GTL1	blue	0.912035	0.659193	0.19661	1.23e-05	0.250437	7.71235	10.3859	5.79084	7.58139	8.64505	5.63245	9.5203	10.4983	2.17231	6.17143	7.71551	10.7731	10.5122	4.21041	8.88695	10.8105	7.17947	3.85658	8.45836	10.64	5.66977	6.48866	6.85675	10.1126	11.6802	3.29879	5.71931	6.88389	9.01127	10.4244	8.83202	6.48492	5.83293	8.72569	10.5334	2.17231
Cluster-18695.21240		blue	0.935453	0.549058	-0.038404	0.000524785	0.824023	2.17231	4.29085	2.17231	3.39661	5.16179	2.17231	5.29651	6.79716	2.17231	2.17231	5.17707	6.79488	6.64119	2.17231	5.12946	5.84637	4.89821	2.17231	5.64789	6.5445	3.74412	2.17231	3.66703	5.41057	6.59147	2.17231	2.17231	2.8862	4.39069	6.2364	4.92814	2.17231	3.11334	5.14309	5.65163	2.17231
Cluster-18695.21241		blue	0.926565	0.522146	-0.0582589	0.00108922	0.735737	2.81473	3.57942	2.17231	2.68457	4.76295	2.17231	4.7326	6.30522	2.17231	2.90722	4.1831	6.60099	6.55525	2.17231	4.21314	6.17418	4.60249	2.89214	4.67675	5.9071	3.61796	2.17231	2.9443	5.44891	6.61516	2.17231	2.17231	3.71098	4.17381	5.81815	5.32966	2.17231	2.72197	4.09343	5.03099	2.17231
Cluster-18695.24242		blue	0.904986	0.527989	-0.176112	0.000934272	0.304214	8.07529	9.29253	8.62337	8.39107	9.0585	8.06479	8.15705	9.34002	7.7662	7.98833	8.32234	9.39513	8.81062	7.96559	8.8772	9.07489	9.30807	8.06525	8.45581	9.16019	8.84674	7.48996	7.97047	8.87366	9.29088	7.65202	7.64256	8.19928	8.80925	9.46699	9.03062	7.39606	8.05107	8.64316	9.30541	8.11246
Cluster-18695.29799		blue	0.920377	0.517644	-0.10123	0.00122363	0.556895	4.23573	11.8448	3.65442	5.21652	9.54582	3.80391	7.9198	12.343	2.17231	2.17231	4.55798	10.91	11.4092	3.48141	5.73527	10.2876	10.6086	2.17231	8.84036	10.3205	8.21008	2.17231	4.50191	9.50673	11.3375	3.29879	2.17231	4.71498	7.2657	9.49392	9.4065	3.12081	2.72197	7.57335	10.4186	2.17231
Cluster-18695.53055		blue	0.921733	0.627299	0.18542	4.23e-05	0.278951	5.82819	7.48683	4.56866	6.80995	7.19898	4.38221	7.64098	8.1759	2.91494	5.5859	7.811	8.86952	8.76932	6.20227	6.91216	8.61502	7.39448	6.51215	8.47605	8.97348	6.99842	5.7431	6.78928	8.61053	8.74682	4.28815	4.08728	7.18157	7.39015	8.64778	8.21517	5.72959	6.14932	7.55411	8.26448	3.24163
Cluster-18695.59612		blue	0.929873	0.579489	-0.160685	0.000212623	0.349176	7.24351	8.57008	6.04005	7.16818	8.44119	5.34148	7.99641	8.93313	4.98044	6.58569	7.98487	9.43682	9.16349	6.46346	7.1684	9.11929	8.50931	7.25953	8.53027	9.96929	7.57634	5.35485	4.88134	8.50647	9.12376	6.1472	4.31665	7.05272	7.57631	9.44187	9.15984	5.45594	6.35071	7.73014	9.50473	5.54198
Cluster-18695.59613		blue	0.936481	0.58651	-0.103563	0.000170414	0.547795	7.48232	8.52082	6.34753	7.39202	8.68897	5.34148	8.31161	8.67292	5.14159	6.73912	7.85647	9.29998	9.29895	6.7919	7.21046	8.96727	8.46247	6.87865	8.62166	9.9496	7.59849	5.63952	5.70718	8.84905	9.25182	6.41576	4.51155	7.10092	8.04354	9.21527	9.1354	5.15823	6.60801	8.12283	9.10473	4.94567
Cluster-18695.59614		blue	0.917115	0.576243	-0.143831	0.00023513	0.402654	7.7248	8.80893	6.5005	7.05423	8.74041	5.3869	8.14962	9.3331	5.14159	6.96324	8.13475	9.68091	9.24244	6.75694	7.80483	9.31903	8.5022	7.9362	9.04891	10.0801	8.02632	5.8765	5.28142	8.74237	9.37637	6.51052	4.38487	7.25794	7.9657	9.37344	9.61177	6.00529	6.86772	8.1991	9.33156	5.87716
Cluster-4286.20		blue	0.915248	0.620073	-0.104742	5.49e-05	0.543223	7.46757	9.78501	8.27007	7.06666	9.07776	8.30002	7.8844	10.3564	5.3747	5.75633	7.50316	10.4347	8.78448	6.98552	9.40177	10.3787	8.80045	6.77666	9.21913	10.9573	7.46021	6.35186	7.32992	9.56618	10.3865	7.36615	4.57064	7.41865	9.44511	10.6566	9.16468	5.81022	6.41949	9.53513	10.1321	6.97133
Cluster-4286.23		blue	0.912447	0.695095	-0.00807331	2.55e-06	0.962728	3.79859	5.78222	4.19257	4.48975	5.67083	4.28576	3.90632	5.81311	2.17231	3.20097	4.1831	5.95681	5.02602	3.82848	5.64552	5.90196	4.85316	3.39513	4.96811	6.2028	4.2288	3.54804	3.66703	5.55809	6.09731	4.17019	2.17231	3.96319	5.352	6.31929	4.42771	3.32418	2.94508	6.23162	6.03138	3.24163
Cluster-63010.1		blue	0.900029	0.533721	-0.0719161	0.000801571	0.676818	4.67138	7.27616	2.17231	3.79354	5.92543	2.17231	3.54538	7.96513	2.17231	2.90722	3.77529	8.61555	5.12632	2.17231	4.52425	7.68322	6.13956	2.17231	5.41381	8.32857	2.84023	2.75157	2.17231	6.51601	7.09935	2.17231	2.81792	2.17231	3.57648	6.80917	5.72316	2.17231	2.17231	5.2761	9.40236	2.17231
Cluster-64266.0		blue	-0.911278	-0.62303	-0.00380089	4.94e-05	0.982447	13.7839	11.702	13.8848	13.3202	9.22789	12.0216	13.8348	9.79274	16.4686	15.2287	13.9253	8.53652	11.2061	14.4916	12.5703	8.37733	9.76527	14.57	11.1584	7.84143	9.7868	15.1718	13.772	10.3428	9.60904	14.7104	15.6186	12.5659	10.3749	8.16874	12.0007	14.708	13.0155	10.6902	9.80641	15.4159
Cluster-18695.59611		blue	0.917507	0.572052	-0.112276	0.000267331	0.514433	6.91418	7.91902	5.26041	6.36236	7.94614	4.78111	7.39271	7.92884	4.2426	5.62167	7.03405	8.84422	8.3009	6.37389	6.7216	8.19296	7.96957	6.43765	7.97325	8.93839	6.80866	5.06383	4.09401	7.96105	8.36282	5.92386	3.90721	6.52586	6.96835	8.52697	8.30119	5.19908	5.81597	7.01181	8.40411	4.62079
Cluster-84084.0		blue	0.921124	0.707562	0.255794	1.4e-06	0.132125	8.44619	9.00078	7.49337	9.05408	9.1914	7.84114	8.7282	9.32149	6.52069	8.51219	8.55287	9.29198	9.0583	7.80393	9.1712	9.87712	8.70772	8.46672	9.40209	10.286	8.6629	8.08281	8.36692	9.42822	10.0299	6.94282	7.87475	8.96601	9.41224	9.89327	8.90324	7.871	8.52832	9.27622	9.57427	6.69835
Cluster-17353.3	threonine-protein kinase ERECTA	turquoise	0.925939	-0.314164	-0.798113	0.062039	5.53e-09	8.41195	9.91894	12.5035	8.41797	9.59524	12.216	8.83169	10.6711	14.1999	7.60107	6.55503	8.57218	12.0736	6.03678	5.99915	9.09726	10.6757	6.35906	6.42021	5.58028	12.3902	5.40646	5.63166	5.92624	11.7311	14.0394	4.92475	4.26467	3.57648	6.78026	12.3212	5.15823	4.78033	5.2761	5.74868	13.672
Cluster-18695.10278	transcription factor GTL1	turquoise	0.900717	-0.134594	-0.765071	0.433841	5.52e-08	8.91127	9.51236	10.4473	9.24505	9.54078	10.6682	8.88862	9.5792	10.1007	9.26705	8.95335	9.53947	10.5292	7.78672	8.47772	9.44415	9.78151	8.20065	9.01647	9.1866	10.0689	8.03903	8.4834	8.91489	9.60462	11.4864	7.44382	8.02927	8.25463	9.14623	10.5134	7.52036	8.00344	8.27937	9.33156	10.4386
Cluster-18695.3415	probable methionine--tRNA ligase	turquoise	-0.928514	0.367011	0.757614	0.0276775	8.82e-08	9.68336	9.26832	8.32948	9.20068	8.9506	8.14536	9.40485	8.89916	7.74992	9.44086	9.45558	9.10075	8.46982	9.61178	9.24382	9.15242	8.8348	9.40761	9.42048	9.56862	8.63818	9.53341	9.76176	9.62119	9.12787	7.30148	10.1323	9.77343	9.86506	9.54415	8.46708	10.0934	9.53544	9.64068	9.60461	7.33036
Cluster-18695.55547	alcohol dehydrogenase-like 2	turquoise	0.921028	-0.186489	-0.770488	0.276138	3.89e-08	8.63939	10.6963	12.991	7.02905	10.341	12.9705	8.14214	10.5178	12.148	5.72384	6.29615	7.84294	11.9576	3.82848	5.08419	8.81543	11.6602	4.85467	6.34497	5.83216	12.4684	4.41403	5.12379	6.56876	10.9195	13.0498	2.81792	2.17231	3.57648	7.14017	12.5098	3.32418	3.66845	4.74129	6.79006	12.389
Cluster-42631.8	transcription factor MYB2	turquoise	-0.914335	0.405434	0.796914	0.0141619	6.06e-09	4.15971	4.6099	2.17231	3.79354	4.08165	2.17231	4.18303	3.50634	2.17231	5.16742	4.79672	3.98769	2.17231	5.18055	4.7763	4.97269	3.55633	4.08605	4.56391	4.8808	2.17231	5.43157	5.23082	5.7232	4.04878	2.17231	5.40926	5.97172	6.16055	5.17891	2.8326	5.61443	4.5039	5.42639	4.92277	2.17231
Cluster-55126.3	zinc finger protein GIS3	turquoise	-0.918027	0.224477	0.762345	0.188107	6.56e-08	5.33317	5.55	3.95317	6.67838	5.98629	5.14352	6.41026	5.05409	2.91494	7.08267	6.80115	5.84399	5.12632	7.30869	6.50185	5.88826	5.52908	7.30208	6.74662	7.01837	4.6968	7.80719	7.12641	6.73177	5.44628	2.9787	8.06976	7.5546	7.05116	6.50769	4.35857	7.77447	7.03024	6.74371	7.05184	4.11659
Cluster-68757.0	protein slr0074	turquoise	-0.922147	0.225741	0.762136	0.185567	6.65e-08	10.0202	9.47052	8.87538	9.79099	9.19941	8.70631	9.48972	9.48032	8.41899	9.85248	9.866	9.64159	9.22032	10.1363	9.82842	9.52117	9.29989	9.99514	9.73994	9.59983	8.79016	10.3886	10.071	9.68217	9.55354	8.28082	10.7019	10.4408	10.1353	9.64368	8.96279	10.5676	9.62649	9.67965	9.96013	8.13481
Cluster-77886.1	proline-rich receptor-like protein kinase PERK8	turquoise	0.917327	-0.225499	-0.750449	0.186052	1.36e-07	8.82429	8.75959	9.75076	8.90477	9.28774	10.2047	7.98809	8.40448	9.83751	8.39924	8.00808	8.4529	10.1434	7.76931	7.9233	8.21767	8.94112	7.98269	8.17552	7.81265	9.4316	7.32735	7.64793	7.96105	9.1217	10.8007	6.94928	7.28947	7.61763	8.3711	10.5294	7.05596	7.76064	7.80799	8.47622	10.1159
Cluster-11194.1		turquoise	0.934111	-0.350104	-0.76083	0.0363267	7.22e-08	5.26572	5.03332	6.943	4.56446	5.13486	6.21113	5.26896	5.98878	7.04631	4.83907	5.2966	4.61137	6.42558	4.09567	4.52425	5.1459	6.02469	4.912	4.74706	5.21544	6.0389	4.3053	4.58678	4.51464	5.75615	7.41588	4.24466	4.64969	4.25021	4.63576	6.26613	4.25218	4.15441	4.30405	4.53494	7.03932
Cluster-18695.45019		turquoise	-0.90222	0.285764	0.750247	0.0911217	1.38e-07	5.23074	3.7316	3.65442	5.28277	5.05082	2.17231	5.05926	5.22604	2.17231	4.77586	5.21806	4.92665	3.86078	7.0154	6.17995	4.42992	4.22264	5.21363	5.6298	4.53844	2.84023	6.71836	5.94379	5.84274	5.39196	2.17231	5.90869	6.41567	6.16055	5.46273	3.72744	6.25555	6.65627	5.68613	4.97793	2.79898
Cluster-18695.65132		turquoise	0.909009	-0.116442	-0.766135	0.498848	5.16e-08	6.93578	8.01272	9.40081	7.00342	7.83939	8.90063	7.1973	8.60939	9.30578	6.81777	7.66528	8.20855	9.41305	6.66561	6.97453	7.83652	8.58862	7.15894	7.66484	7.78327	9.28008	5.91243	6.3003	7.44586	8.43767	9.73155	5.79331	6.95119	7.07114	7.69875	9.42072	5.83612	6.0222	6.60081	7.28401	8.9748
Cluster-2429.6		turquoise	-0.904524	0.321422	0.754542	0.0559351	1.06e-07	10.2497	10.7302	8.79336	10.1206	9.90258	8.68401	9.56569	9.17172	6.4817	10.7048	11.191	9.46555	9.02679	11.005	10.8213	9.7207	9.32428	10.8825	10.6821	10.2912	8.334	11.078	10.8596	10.475	8.9464	6.92575	11.1868	11.6849	11.3255	10.1147	8.75068	11.0259	11.1866	11.0507	10.7888	7.05816
Cluster-31128.4		turquoise	-0.922211	0.257828	0.760312	0.128972	7.46e-08	3.79859	3.57942	2.93739	4.32637	3.36428	2.17231	3.74003	3.50634	2.17231	3.75315	4.09307	3.40307	2.89409	4.50381	4.59181	3.38394	3.41908	4.52515	4.30482	4.20822	2.17231	4.65225	4.74201	4.27011	3.20089	2.17231	4.96862	4.94882	4.88606	4.49537	2.8326	4.98168	4.03421	4.64461	4.28892	2.79898
Cluster-33437.5		turquoise	-0.91131	0.261106	0.751187	0.124008	1.3e-07	7.12631	6.61623	6.09611	6.69449	6.69897	5.8089	7.08477	7.21418	5.08992	6.78682	7.11117	7.0313	6.44484	7.88703	7.57475	7.2912	6.29623	7.74905	7.54539	7.38733	6.18315	8.01869	7.8182	7.41743	6.62686	4.39626	8.13717	8.13134	7.4216	7.24962	5.98774	8.15794	8.08666	7.67183	7.1255	5.17382
Cluster-33437.6		turquoise	-0.924936	0.197415	0.779516	0.248464	2.12e-08	7.74328	7.16386	6.84855	7.49671	7.2431	6.39865	7.43615	7.47138	6.59562	7.93294	7.75034	7.45105	7.07068	8.13152	8.2896	7.63508	6.90519	8.0086	7.57853	7.71231	6.43424	8.03499	8.50456	7.72635	7.1888	6.31429	8.57591	8.76027	8.25463	7.7141	6.93332	8.48516	8.14858	7.91238	7.65941	6.43517
Cluster-39936.0		turquoise	-0.926066	0.368795	0.75463	0.0268735	1.06e-07	4.37552	4.09631	3.65442	4.82775	4.83232	2.93267	4.60374	4.099	2.17231	4.56646	4.62173	4.68053	2.89409	5.37975	5.1733	4.64713	4.06652	5.34309	5.05299	5.32967	3.61796	5.06383	5.42313	5.44891	4.25582	2.17231	5.76907	5.40348	5.91644	4.98648	3.29725	5.64411	5.37986	5.17755	4.97793	2.79898
Cluster-45128.9		turquoise	-0.910936	0.331511	0.760318	0.0482547	7.46e-08	8.84724	4.92505	2.17231	8.54985	8.92956	2.17231	8.96472	5.05409	2.17231	7.76865	8.59945	8.78087	6.17174	12.3252	10.3232	9.52997	6.69652	10.2307	11.1573	10.0821	3.47537	11.9122	11.4957	10.7644	8.71981	2.17231	11.1569	11.3391	11.4326	10.2406	7.44418	12.1948	11.6817	11.4327	11.5086	3.05185
Cluster-53866.4		turquoise	-0.90345	0.28775	0.757298	0.0887982	8.99e-08	9.49274	3.86586	2.17231	9.8151	8.83397	2.17231	8.64869	3.65181	2.17231	8.56778	8.44221	6.45548	2.17231	13.8634	12.1055	9.60993	4.06652	11.8547	12.0533	9.64406	2.17231	13.2521	12.7361	11.5446	6.62686	2.9787	12.5995	12.998	12.9431	11.3581	6.19196	13.546	13.1613	12.9774	12.5832	2.17231
Cluster-57406.0		turquoise	0.905418	-0.414096	-0.81136	0.0120478	1.95e-09	7.56776	8.09459	9.74423	7.97311	8.40006	9.89872	8.0652	9.11903	10.0732	8.19077	7.8692	8.12696	8.3009	7.3793	7.35807	8.23661	8.86282	7.7336	7.91143	7.32072	9.33164	7.35359	7.48709	7.25554	8.09499	9.61141	7.05276	6.78404	6.88049	7.11724	8.78566	6.71078	7.48459	6.84227	7.22938	10.0679
Cluster-61707.0		turquoise	-0.907621	0.268924	0.762526	0.112745	6.49e-08	13.4886	13.1415	12.1008	13.7094	13.3983	11.9322	13.0273	12.8826	12.1711	13.1332	13.7798	13.4169	12.3152	14.5131	13.9334	12.7579	12.6383	13.8602	13.5785	12.9626	12.017	14.1063	14.0052	13.615	12.765	11.9173	13.9432	14.6895	14.2658	13.2803	12.5749	14.6401	13.9917	14.1219	13.6138	12.3429
Cluster-68625.0		turquoise	-0.927506	0.282638	0.773352	0.0948739	3.22e-08	7.1074	6.7929	5.0468	7.18537	6.94791	4.55623	7.16814	6.49964	3.90541	7.22791	6.87885	7.31023	5.71153	8.15182	7.69807	7.28601	6.63274	7.60361	7.25445	7.5819	5.42507	8.17395	7.76657	8.08668	7.33845	5.48195	8.8443	7.65482	7.74737	7.50933	5.69648	8.25175	7.76943	7.28518	7.44608	5.27528
Cluster-72756.7		turquoise	-0.917067	0.332001	0.798329	0.0479041	5.44e-09	9.68496	9.76207	8.8472	9.64133	9.4321	8.82112	9.8545	9.57138	9.03735	10.1129	10.3497	10.2225	8.82535	9.82901	10.1865	9.43715	9.26253	9.93732	9.83895	9.98657	8.87421	10.3427	10.7162	10.1505	9.69891	8.50976	10.5644	10.7406	10.5522	10.0067	9.02531	10.7646	9.96535	10.3104	10.2547	8.48025
Cluster-78182.2		turquoise	0.925078	-0.344674	-0.780683	0.0395308	1.96e-08	6.72855	7.24338	7.71459	6.71043	7.39607	8.02275	6.71285	7.163	8.66884	6.67294	6.78778	7.22313	7.66956	6.56809	6.28235	7.06149	7.46932	6.37911	6.75494	6.42252	7.4921	5.98168	6.0916	6.36509	7.30974	8.29417	6.42417	6.21083	6.26858	6.45372	7.66526	6.25555	6.58825	6.37043	6.2005	8.49414
